# Supplementary material
Source: publisher figshare collection journal article supplement (https://tandf.figshare.com/ndownloader/files/20284236)
Supplement: Supplementary file 1 [file 20284236]

**Table S1: Sequence of the Primers Used for Real time PCR**

| **Sequence Name** | **Primer** |
| --- | --- |
| ZnT1F | TGTGAACTTGCCTGCAGAAC |
| ZnT-1R | TGGGGTCTTTTCTGCATCCT |
| ZnT-2F | TGTCCTAGTGGCAGCCTATATT |
| ZnT-2R | TCACATCTCTCAGGATGGTCAA |
| ZnT-3F | CACCCTCCGAGACGTTCTTC |
| ZnT-3R | GGCACCGACAACAGCGTAT |
| ZnT-4F | TGACCTAAGCGCCATCATACT |
| ZnT-4R | AGCTGACAAAACCTCTAAGCG |
| ZnT-5F | GGAGGCATGAATGCTAACATGAGG |
| ZnT-5R | GTGGATACGATCACACCAATGCTG |
| ZnT-6F | CCTCAACATACAGGCCAAGC |
| ZnT-6R | TGGTGTTAGGCTGTGGTTCA |
| ZnT-7F | TTTCTTCCTGTGCCTGAACCTCTC |
| ZnT-7R | GAGTCGGAAATCAAGCCTAAGCAG |
| ZnT-8F | GATCCAGGCGACTGTGATGAT |
| ZnT-8R | TGGCTTGTACTTCCTTGTGATTG |
| ZnT-9F | AGCCTAGGTTCTTTGGGTGT |
| ZnT-9R | ACTTGTTCTGGCTGGATGGA |
| ZnT-10F | GCTGTGCCTGGAATTAGCAGT |
| ZnT-10R | ATGTGCAGGGTGGCAATAATC |
| ZIP-1F | TAAGGACAGGCTCACATGGG |
| ZIP-1R | GCTAGGACCAACAGGACACT |
| ZIP-2F | CTCACGATGGGCAGTGTTCTC |
| ZIP-2R | ATGAAGGCAAAACCAGCGGC |
| ZIP-3F | CTGCTGGGCTTCTTCATGAC |
| ZIP-3R | GTTGAAGGTCTCCAGGTCGA |
| ZIP-4F | ATGTCAGGAGCGGGTCTTGC |
| ZIP-4R | GCTGCTGTGCTGCTGGAAC |
| ZIP-5F | GGGGCTGTCAGTGCTCGGAG |
| ZIP-5R | TCCGGATCCAAGTTGCGTGTT |
| ZIP-6F | AGTTTCCTGTCTCTGCTGGG |
| ZIP-6R | CACCACTCAAAGTCCCAACG |
| ZIP-7F | AAGATTAGTGTCCCAGGGCC |
| ZIP-7R | CCGCTCTCCCATTCCCTTAA |
| ZIP-8F | TGCTACCCAAATAACCAGCTCC |
| ZIP-8R | ACAGGAATCCATATCCCCAAACT |
| ZIP-9F | TCAACTTTGCTGCTGAACCC |
| ZIP-9R | AGTCCCAGCAAACTCTCCTC |
| ZIP-10F | CACAGTCACCAACATGCACA |
| ZIP-10R | TGCCTCCTAGAGCAACAA |
| ZIP-11F | CGGCATCTGCTACCTTTGAGAG |
| ZIP-11R | ATGATGTCGTCCATGACCACG |
| ZIP-12F | TTTCCTGGGATCAGACCTGCT |
| ZIP-12R | GTTGGTCCTTGGGTAAGTGGC |
| ZIP-13F | TCTGAAAACATCCACGGTGA |
| ZIP-13R | AGCCATAATCCCCAACCATT |
| ZIP-14F | TTTGACCTCCTCTTCCCCAC |
| ZIP-14R | GCAGTCTCCCCTCTAACACA |
| SOCS3-F | CCACTCTTCAGCATCTCTGT |
| SOCS3-R | AGCTGGGTGACTTTCTCATA |
| MT-F | ATGGACCCCAACTGCTCCTGC |
| MT-R | GGCACAGCAGCTGCACTTCTC |
| GAPDH-F | AATCCCATCACCATCTTCCA |
| GAPDH-R | TGGACTCCACGACGTACTCA |
| Β-actin-F | TCCCTGGAGAAGAGCTACGA |
| B-actin-R | AGCACTGTGTTGGCGTACAG |
